# Supplementary material
Source: PubMed Central journal article supplement (PMC2951608)
Supplement: NIHMS232618-supplement-Supp.pdf [file NIHMS232618-supplement-Supp.pdf]

# RESEARCH REPORTS

Biological

C.B. Gonzales\*<sup>1</sup>, D. Simmons<sup>2</sup>, and M. MacDougall<sup>3</sup>

<sup>1</sup>University of Texas Health Science Center at San Antonio Dental School, Department of Dental Diagnostic Science, 7703 Floyd Curl Drive, MCS 7888, San Antonio, TX 78229-3900, USA; <sup>2</sup>University of North Carolina, School of Dentistry, Department of Dental Research CB#7454, Chapel Hill, NC 27599-7450, USA; and <sup>3</sup>University of Alabama at Birmingham, School of Dentistry, Institute of Oral Health Research, Department of Oral and Maxillofacial Surgery, 1919 7th Avenue South, Rm 702, Birmingham, AL 35294, USA; \*corresponding author, knightcb@uthscsa.edu

*J Dent Res* 89(6):592-596, 2010

## Competing Roles of TGFβ and Nma/BAMBI in Odontoblasts

### APPENDIX

Semi-quantitative RT-PCR (SQ-RTPCR) amplification of Nma/BAMBI expression (500 bp) and GAPDH (407 bp) transcripts from MD10-A2 cells transiently co-transfected with Nma/BAMBI-V5-His expression construct and the DSPP-Luc reporter construct. **(A)** SQ-RTPCR of Nma/BAMBI in MD10-A2 cells

transfected with Nma/BAMBI-V5-His expression construct (Nma F) compared with non-transfected control cells. The asterisk (\*) indicates that transfected cells expressed statistically significantly higher levels of Nma/BAMBI compared with non-transfected control cells (n = 4; p = 0.05; ± SD). **(B)** SQ-RTPCR of Nma/BAMBI in MD10-A2 cells treated with TGFβ compared with untreated cells. TGFβ significantly decreased endogenous

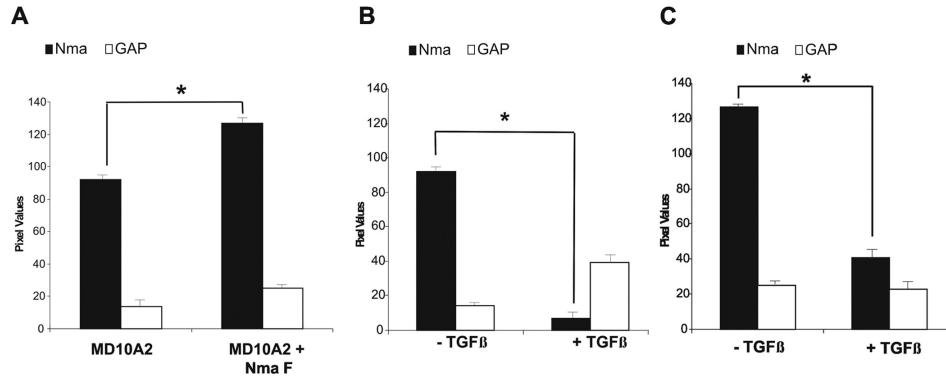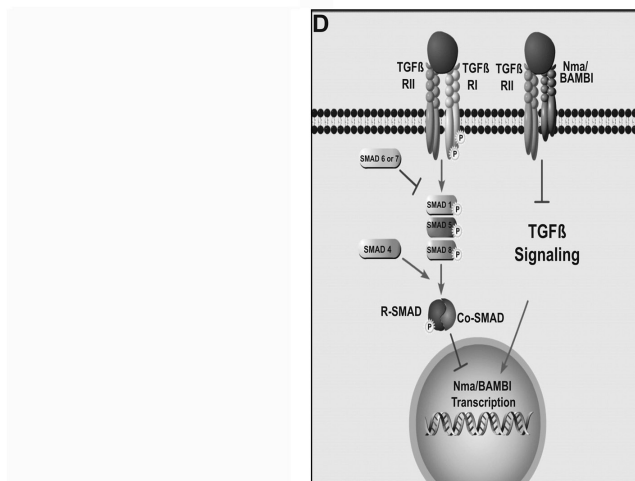

Nma/BAMBI expression in non-transfected MD10-A2 cells, as indicated by the asterisk (\*) ( $n = 4$ ;  $p = 0.05$ ;  $\pm$  SD). **(C)** SQ-RTPCR of Nma/BAMBI in MD10-A2 cells co-transfected with the Nma/BAMBI-V5-His expression construct (Nma F) and the DSPP-Luc reporter construct. TGF $\beta$  significantly decreased Nma/BAMBI expression in transfected MD10-A2 cells, as indicated by the asterisk (\*) ( $n = 4$ ;  $p = 0.05$ ;  $\pm$  SD). **(D)** Illustration summarizing the competing roles of Nma/BAMBI and TGF $\beta$ .

Nma/BAMBI interacts with the TGF $\beta$ /TGF $\beta$ RII complex, thereby inhibiting its ability to interact with other TGF $\beta$  type I receptors. Nma/BAMBI also lacks a serine/threonine kinase domain; thus, no downstream phosphorylation events take place, and TGF $\beta$  action is halted. In this illustration, we demonstrate that TGF $\beta$  signaling down-regulates Nma/BAMBI mRNA transcription. However, if Nma/BAMBI is present, it blocks TGF $\beta$  signaling and allows Nma/BAMBI mRNA transcription to occur.
